# Supplementary material
Source: Royal Society of Chemistry journal article supplement (doi:10.1039/d6ta00903d)
Supplement: d6ta00903d1.pdf [file d6ta00903d1.pdf]

## Interface Engineering Enables Robust ZIF-8/N-BaTa<sub>2</sub>O<sub>6</sub> Films for CO<sub>2</sub> Photoreduction via Dynamic CO<sub>2</sub> Enrichment-Activation Synergy

Hengtao Fu<sup>1</sup>, Huihui Li<sup>1,\*</sup>, Yicheng Yong, Danfeng Xiao, Yuhua Wang\*

National & Local Joint Engineering Laboratory for Optical Conversion Materials and Technology,  
School of Materials and Energy, Lanzhou University, 222 South Tianshui Road, Lanzhou 730000,  
PR China

\* Corresponding author.

E-mail address: lihh@lzu.edu.cn (H. Li), wyh@lzu.edu.cn (Y. Wang).

<sup>1</sup>Dr. Li and Mr. Fu are co-first authors.

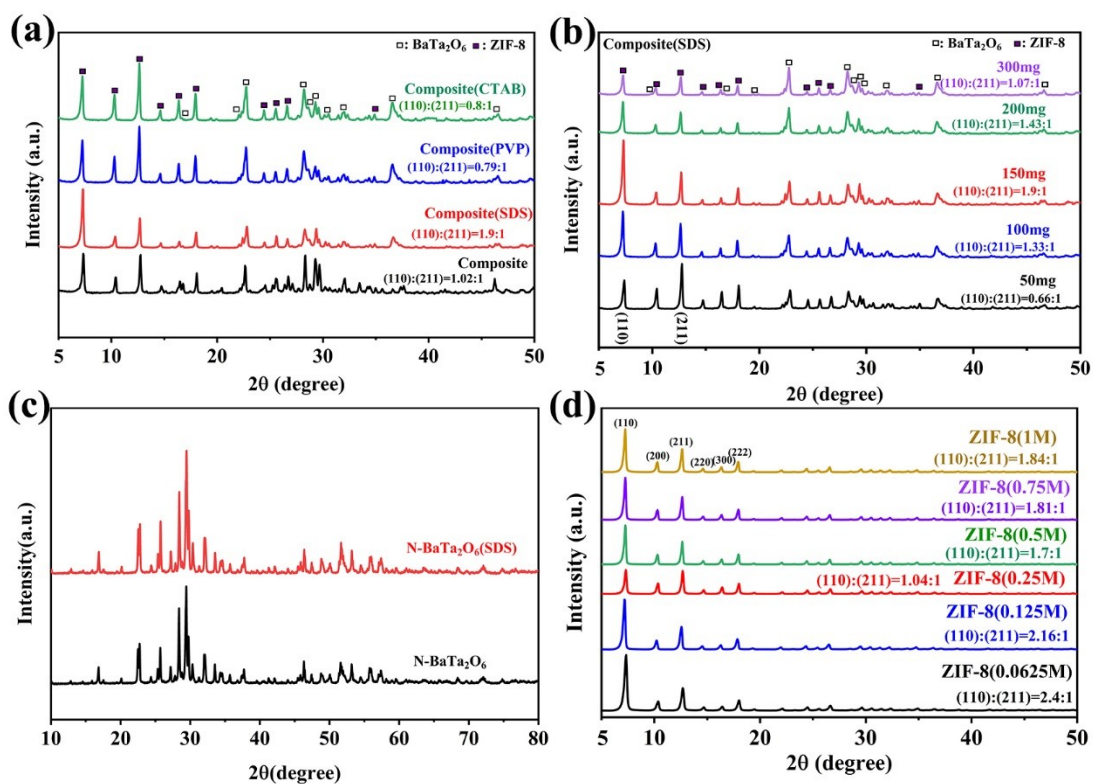

**Figure S1.** XRD patterns of various samples. (a) Composites synthesized with different surfactant treatments. (b) Composites prepared with different mass ratios of added N-BaTa<sub>2</sub>O<sub>6</sub>. (c) N-BaTa<sub>2</sub>O<sub>6</sub> before and after SDS treatment. (d) ZIF-8 samples synthesized with different precursor concentrations.

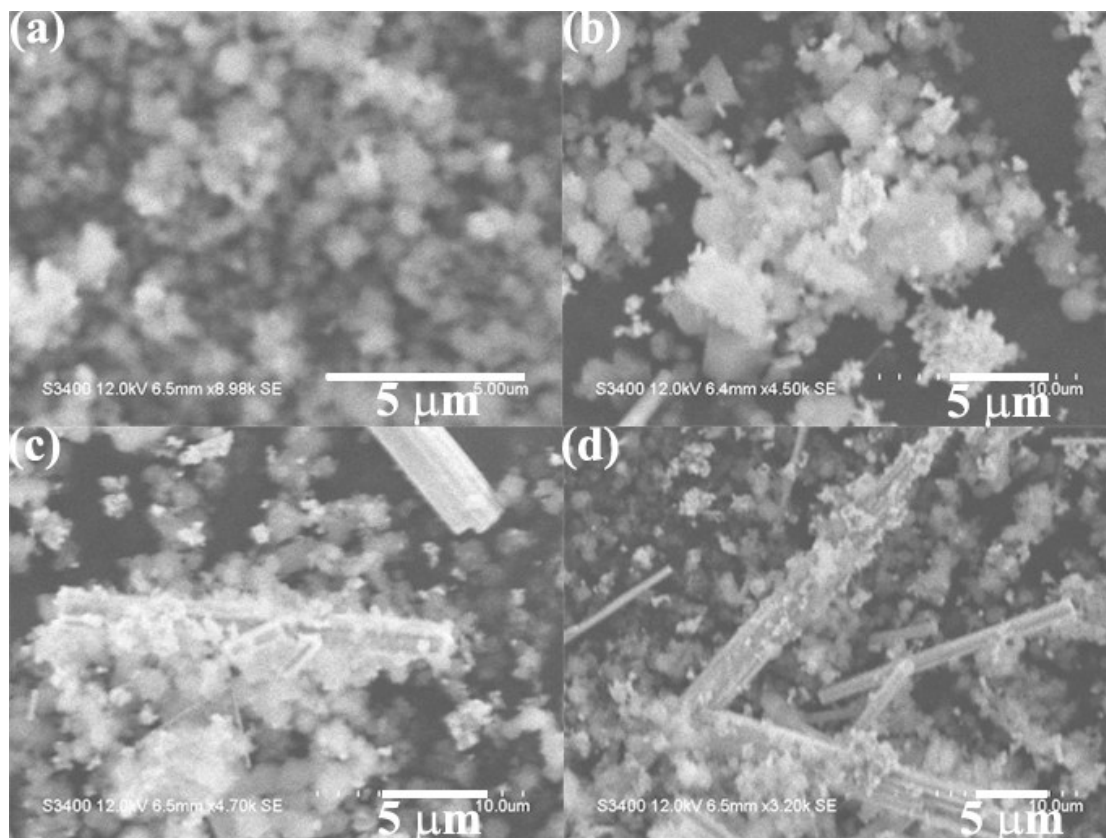

**Figure S2.** SEM images of composites synthesized with different mass ratios of added N-BaTa<sub>2</sub>O<sub>6</sub>. (a) 50 mg, (b) 100 mg, (c) 200 mg, (d) 400 mg

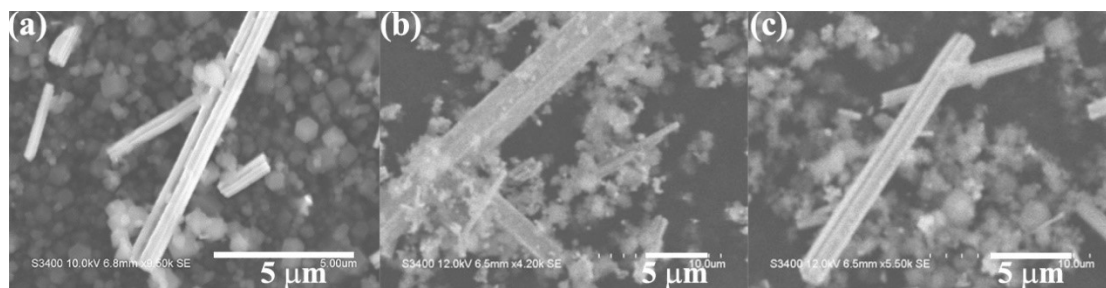

**Figure S3.** SEM images of composites prepared with different surfactant treatments. (a) Direct hydrothermal synthesis (no surfactant), (b) with CTAB addition, (c) with PVP addition.

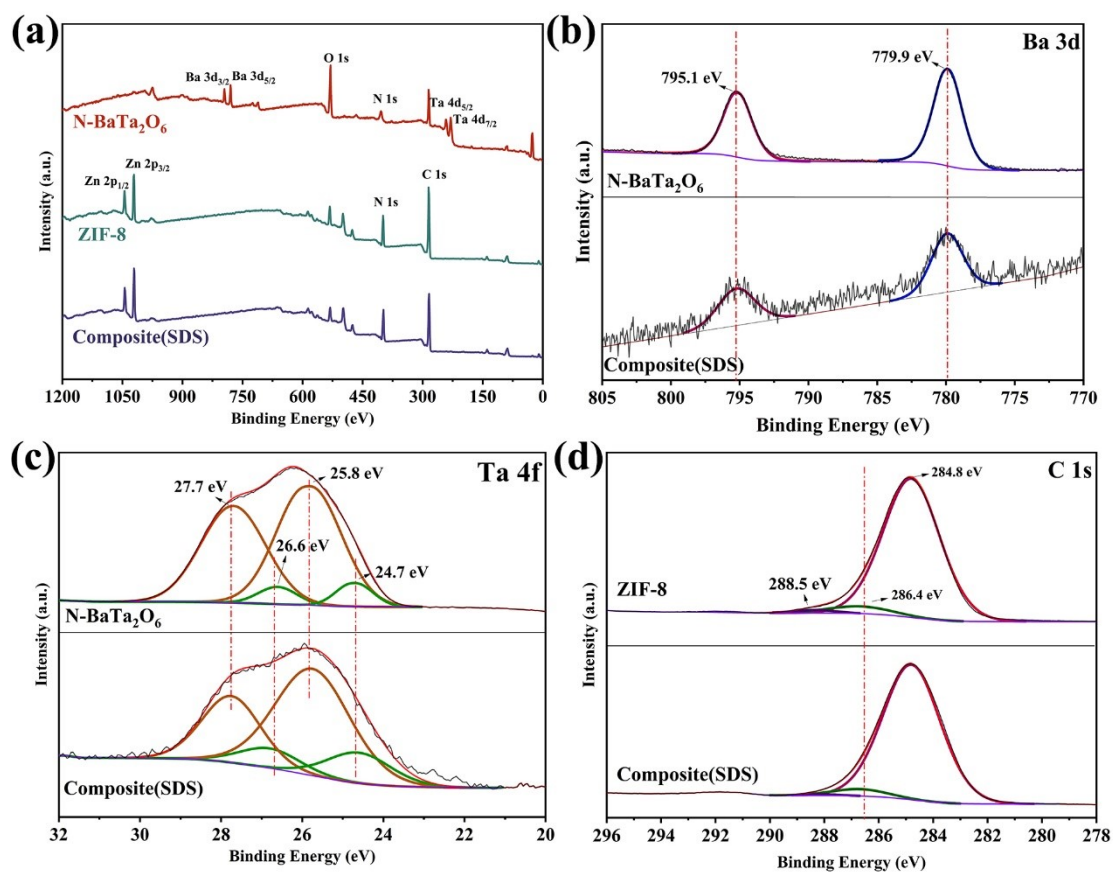

**Figure S4.** XPS spectra of samples before and after hybridization. (a) Survey spectra of the composite, pristine ZIF-8, and N-BaTa<sub>2</sub>O<sub>6</sub>. (b) Ba 3d spectra of the composite and N-BaTa<sub>2</sub>O<sub>6</sub>. (c) Ta 4f spectra of the composite and N-BaTa<sub>2</sub>O<sub>6</sub>. (d) C 1s spectra of the composite and ZIF-8.

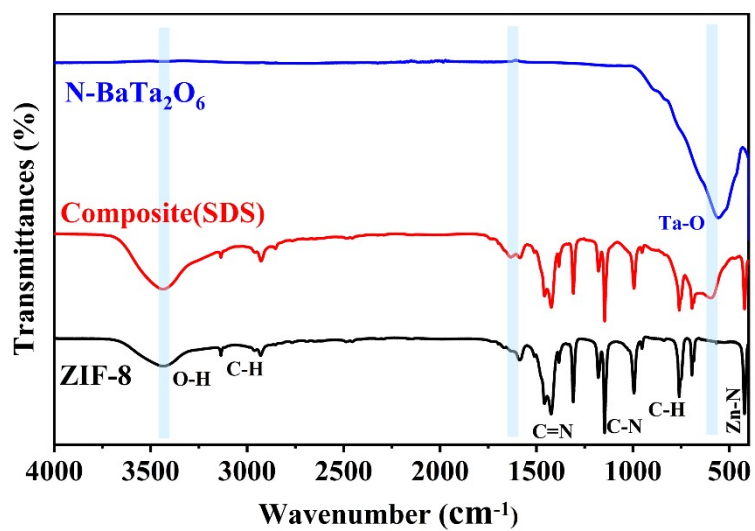

**Figure S5.** FTIR spectra of the optimal composite (red), pristine ZIF-8 (black) and bare N-BaTa<sub>2</sub>O<sub>6</sub> (blue).

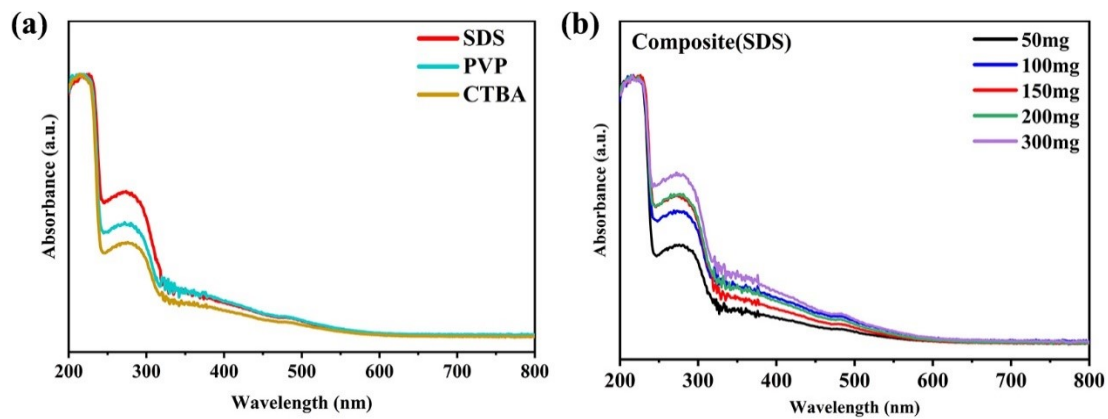

**Figure S6.** DRS spectra of composites synthesized with (a) different surfactant treatments and (b) different mass ratios of added N-BaTa<sub>2</sub>O<sub>6</sub>.

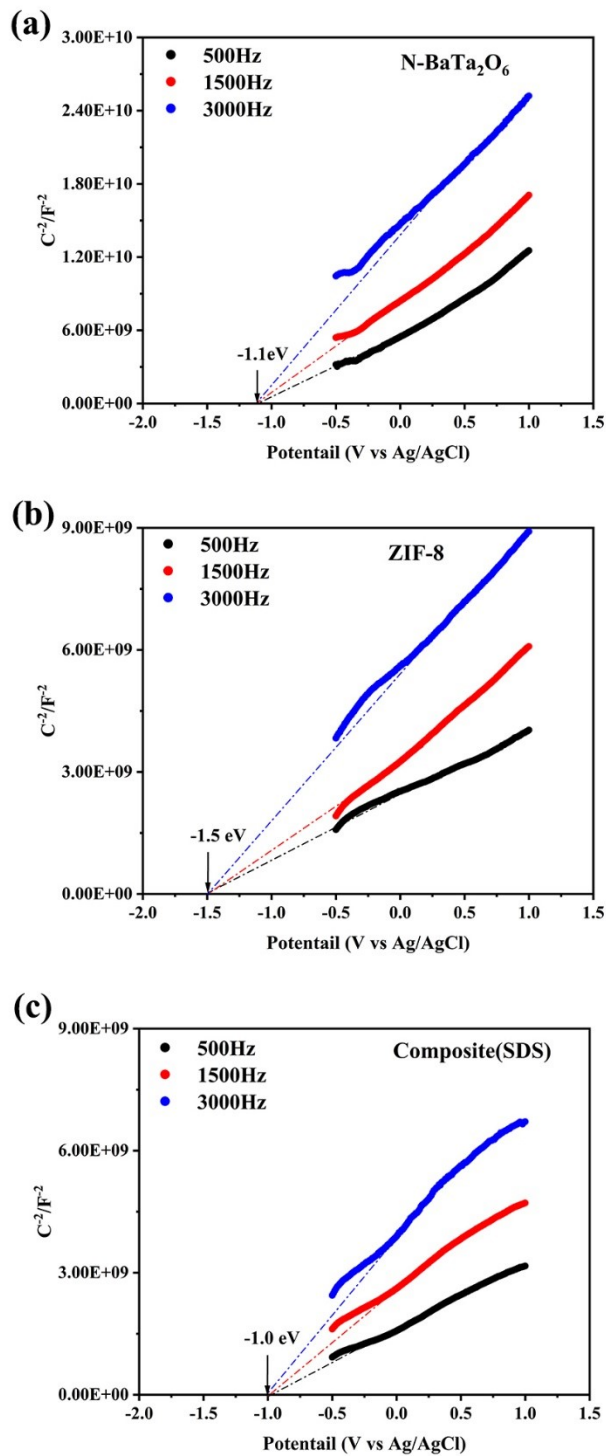

**Figure S7.** Mott-Schottky plots of (a) N-BaTa<sub>2</sub>O<sub>6</sub>, (b) ZIF-8, and (c) the composite, respectively.

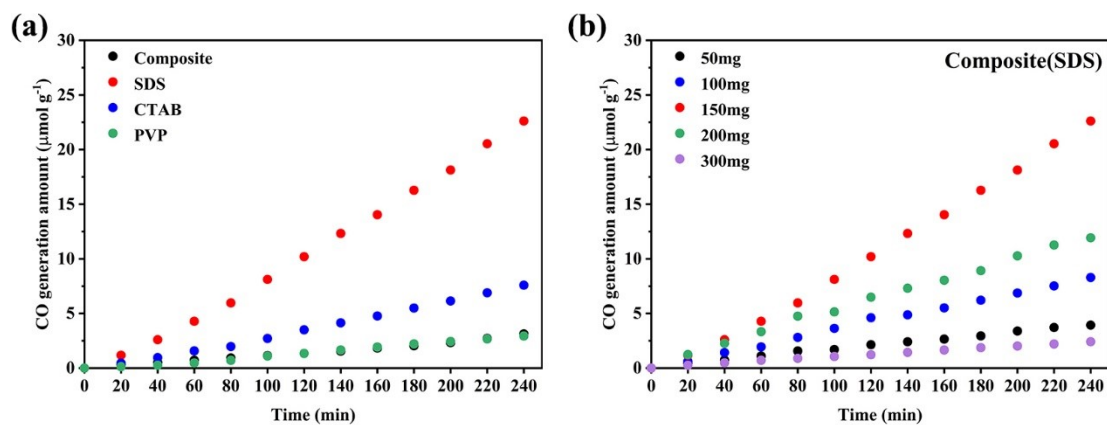

**Figure S8.** (a) Photocatalytic CO production of composites synthesized with different surfactants (SDS, CTAB, PVP) compared to the direct hydrothermal composite (no surfactant). (b) CO production of composites prepared with different amounts of SDS treated N-BaTa<sub>2</sub>O<sub>6</sub> in the precursor solution of ZIF-8.

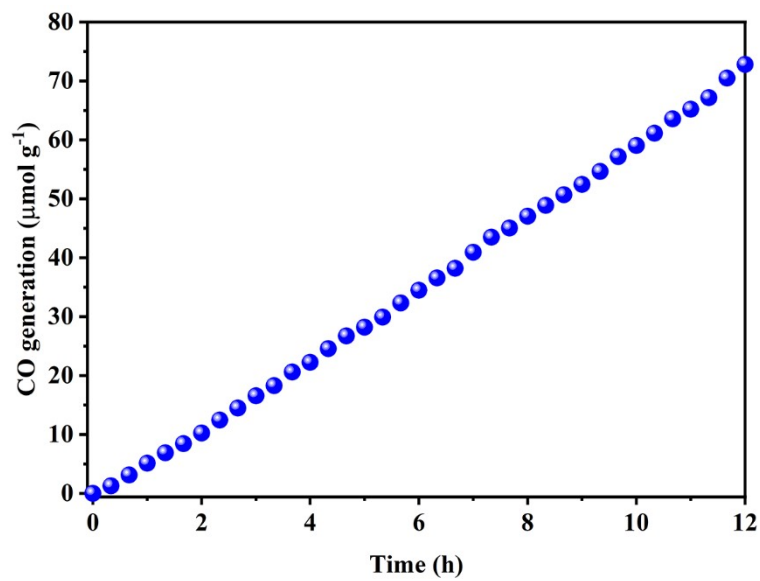

**Figure S9.** Long-term continuous CO production over the ZIF-8/SDS-N-BaTa<sub>2</sub>O<sub>6</sub> composite sheet under 12 h of irradiation.

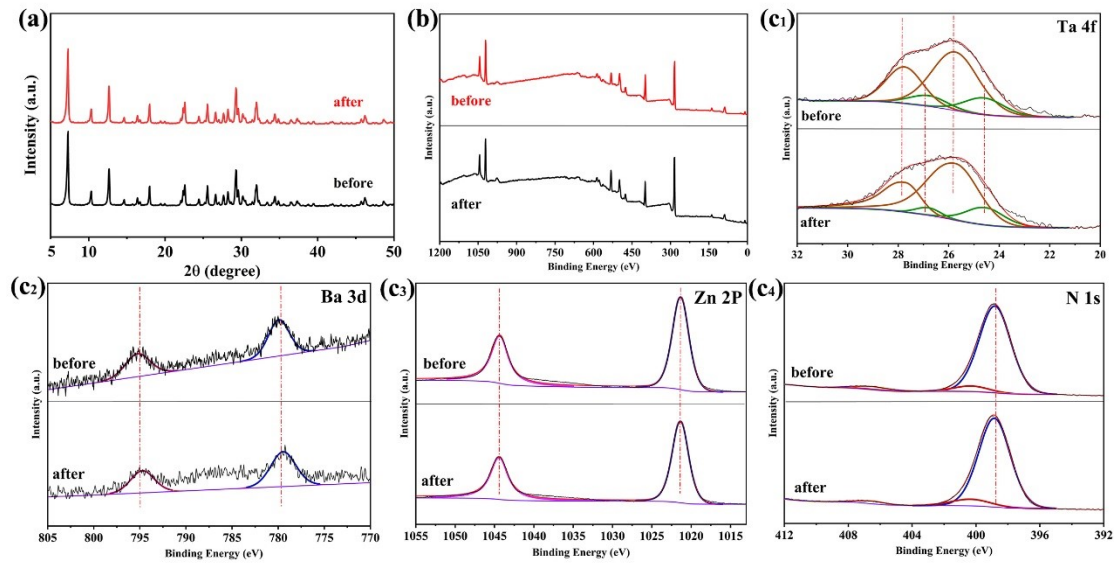

**Figure S10.** Characterization of the optimal composite before and after photocatalytic reaction. (a) XRD patterns. (b) XPS survey spectra. (c1) XPS Ta 4f spectra. (c2) XPS Ba 3d spectra. (c3) XPS Zn 2p spectra. (c4) XPS N 1s spectra.

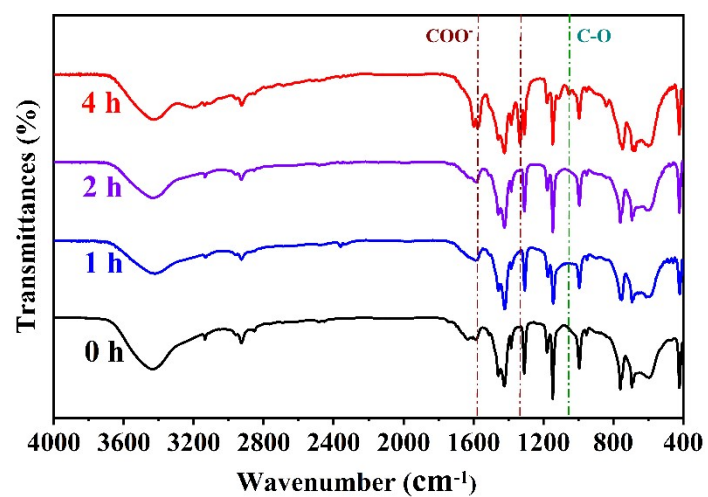

**Figure S11.** Ex-situ FTIR spectra of the ZIF-8/SDS-N-BaTa<sub>2</sub>O<sub>6</sub> composite after 0, 1, 2, and 4 h of photocatalytic CO<sub>2</sub> reduction in pure water.

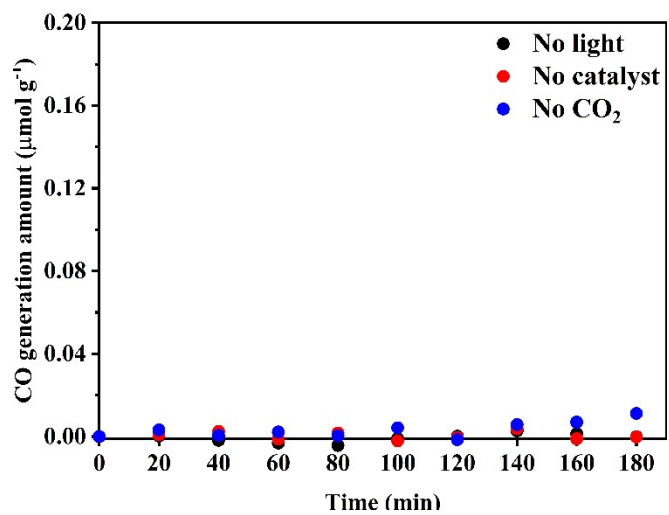

**Figure S12.** Blank control experiments under different conditions.

**Table S1.** Conduction band minimum ( $E_{CB}$ ), valence band maximum ( $E_{VB}$ ), and band gap ( $E_g$ ) values for ZIF-8 and N-BaTa<sub>2</sub>O<sub>6</sub> derived from Mott-Schottky, UPS, and DRS measurements.

| Samples                            | CB (eV) | VB (eV) | Band energy (eV) |
|------------------------------------|---------|---------|------------------|
| ZIF-8                              | -1.2    | 2.1     | 3.3              |
| N-BaTa <sub>2</sub> O <sub>6</sub> | -0.9    | 1.1     | 2.0              |

**Table S2.** Textural properties of ZIF-8 and the optimal composite determined from N<sub>2</sub> adsorption-desorption isotherms using BET and t-Plot methods: specific surface area ( $S_{\text{BET}}$ ), micropore volume ( $V_{\text{micro}}$ ), and average pore size.

| Samples         | $S_{\text{BET}}$<br>(m <sup>2</sup> g <sup>-1</sup> ) | $S_{\text{mic}}$<br>(m <sup>2</sup> g <sup>-1</sup> ) | $V_{\text{total}}$<br>(cm <sup>3</sup> g <sup>-1</sup> ) | $V_{\text{mic}}$<br>(cm <sup>3</sup> g <sup>-1</sup> ) | Average<br>Pore Size (nm) |
|-----------------|-------------------------------------------------------|-------------------------------------------------------|----------------------------------------------------------|--------------------------------------------------------|---------------------------|
| ZIF-8           | 1830                                                  | 1837                                                  | 0.6195                                                   | 0.6279                                                 | 1.13                      |
| Composite (SDS) | 1100                                                  | 1097                                                  | 0.3968                                                   | 0.3737                                                 | 1.23                      |

**Table S3.** Relative content (%) of Ta-N and Ta-O species obtained from the deconvolution of XPS Ta 4f spectra for pristine N-BaTa<sub>2</sub>O<sub>6</sub> subjected to different photocatalytic reaction durations.

| Content (%) | Peaks<br>(eV) | before reaction |             |              |    |
|-------------|---------------|-----------------|-------------|--------------|----|
|             |               | 4h reaction     | 8h reaction | 16h reaction |    |
| Ta-N        | 24.7、26.6     | 22              | 8           | 4            | 2  |
| Ta-O        | 25.8、27.7     | 78              | 92          | 96           | 98 |

**Table S4.** Peak area values for the Ta-O, O-H, and C=O species obtained from the deconvolution of XPS O 1s spectra for pristine N-BaTa<sub>2</sub>O<sub>6</sub> subjected to different photocatalytic reaction durations.

| Peak area | Peak<br>(eV) | before<br>reaction | 4h reaction | 8h reaction | 16h reaction |
|-----------|--------------|--------------------|-------------|-------------|--------------|
| Ta-O      | 530.0        | 6139               | 4926        | 5355        | 7139         |
| O-H       | 531.4        | 5422               | 4410        | 4645        | 4273         |
| C=O       | 532.4        | 0                  | 1623        | 1950        | 2157         |

**Table S5.** Comparison of photocatalytic CO production rates for representative MOF-oxide composite photocatalysts.

| Photocatalyst                                                  | Sacrificial agent/photosensitizer                                   | CO generation rate ( $\mu\text{mol g}^{-1} \text{h}^{-1}$ ) | Reference No. |
|----------------------------------------------------------------|---------------------------------------------------------------------|-------------------------------------------------------------|---------------|
| ZIF-8/N-BaTa <sub>2</sub> O <sub>6</sub> (sheet)               | -                                                                   | 6.5                                                         | Our work      |
| Co-MOF/Cu <sub>2</sub> O                                       | -                                                                   | 3.8                                                         | S1            |
| Cu <sub>2</sub> O/Ni-MOF                                       | -                                                                   | 5.4                                                         | S2            |
| UiO-66/Bi <sub>4</sub> O <sub>5</sub> Br <sub>2</sub>          | -                                                                   | 8.4                                                         | S3            |
| MOF-BiOBr/CdIn <sub>2</sub> S <sub>4</sub>                     | -                                                                   | 3.4                                                         | S4            |
| Ce/Zr-NH <sub>2</sub> -UiO-66/CdIn <sub>2</sub> S <sub>4</sub> | -                                                                   | 6.0                                                         | S5            |
| NiFe <sub>2</sub> O <sub>4</sub> @N/C/SnO <sub>2</sub>         | TEOA+MeCN+[Ru(bpy) <sub>3</sub> ]Cl <sub>2</sub> •6H <sub>2</sub> O | 2057.4                                                      | S6            |
| In <sub>2</sub> O <sub>3</sub> @ZIF-67                         | TEOA+[Ru(bpy) <sub>3</sub> ]Cl <sub>2</sub> •6H <sub>2</sub> O      | 33420                                                       | S7            |
| PtO/Fe-soc-MOFs                                                | TEOA                                                                | 56.7                                                        | S8            |
| ZIF-67/DCD/Ru                                                  | -                                                                   | 1495                                                        | S9            |
| Pd-HPP-TiO <sub>2</sub> (sheet)                                | -                                                                   | 4.9                                                         | S10           |

## Reference

- S1. D.-S. Li, W.-W. Dong, J. Jia, Y. Wang, J.-R. An, O.-Y. Yang, X.-J. Gao, Y.-L. Liu and J. Zhao, *Chem. Eng. J.*, 2022, **438**, 135622.
- S2. H. Jiang, M. Xu, X. Zhao, H. Wang and P. Huo, *J. Environ. Chem. Eng.*, 2023, **11**, 109504.
- S3. D. Li, B. Zhu, Z. Sun, Q. Liu, L. Wang and H. Tang, *Front. Chem.*, 2021, **9**, 804204.
- S4. M. Shen, Y. Li, T. Luo, Z. Wang, M. Zhou, Y. Wang, S. Xu and Z. Li, *Sep. Purif. Technol.*, 2025, **355**, 129713.
- S5. S. Li, H. Li, Y. Wang, Q. Liang, M. Zhou, D. Guo and Z. Li, *Sep. Purif. Technol.*, 2024, **333**, 125994.
- S6. W. Zhang, Y. Yu, R. Huang and X. Shi, *ACS Appl. Mater. Interfaces*, 2021, **13**, 40571–40581.
- S7. Y.-J. Wang, B. He, D. Ma, R. Li, Y. Xie and J.-R. Li, *Chem. Eng. J.*, 2023, **467**, 143329.
- S8. X.-Y. Zhang, P. Wang, X.-Y. Lu, Y. Zhang and W.-Y. Sun, *Chem. Eng. J.*, 2023, **476**, 146560.
- S9. F. Dai, M. Zhang, Q. Chen, M. Mi, Z. Li, J. Han, J. Xing, S. Feng and L. Wang, *Appl. Catal. B Environ.*, 2023, **336**, 122934.
- S10. Y. Ma, X. Yi, S. Wang, T. Li, B. Tan, C. Chen, T. Majima, E. R. Waclawik, H. Zhu and J. Wang, *Nat. Commun.*, 2022, **13**, 1400.
